# Supplementary material for: Platinum nanoparticles on porphyrin functionalized graphene nanosheets as a superior catalyst for methanol electrooxidation
Source: Royal Society of Chemistry journal article supplement (doi:10.1039/c4nr04140b), 2014-10-06
Supplement: c4nr04140b1.pdf [file c4nr04140b1.pdf]

## Supplementary Information

### **Platinum nanoparticles on porphyrin functionalized graphene nanosheets as superior catalyst for methanol electrooxidation**

Rui-Xiang Wang,<sup>a</sup> Jing-Jing Fan,<sup>a</sup> You-Jun Fan,<sup>\*a</sup> Jing-Ping Zhong,<sup>a</sup> Li Wang,<sup>a,b</sup> Shi-Gang Sun<sup>\*b</sup>

and Xing-Can Shen<sup>a</sup>

<sup>a</sup> *Key Laboratory for the Chemistry and Molecular Engineering of Medicinal Resources (Ministry of Education of China), College of Chemistry and Pharmaceutical Sciences, Guangxi Normal University, Guilin 541004, China*

<sup>b</sup> *State Key Laboratory of Physical Chemistry of Solid Surfaces, Department of Chemistry, College of Chemistry and Chemical Engineering, Xiamen University, Xiamen 361005, China*

E-mail: [youjunfan@mailbox.gxnu.edu.cn](mailto:youjunfan@mailbox.gxnu.edu.cn); [sgsun@xmu.edu.cn](mailto:sgsun@xmu.edu.cn)

Fax: +86-773-2120958; +86-592-2180181

Tel: +86-773-5846279; +86-592-2180181

## 1. TEM characterization of 20% commercial Pt/C catalyst

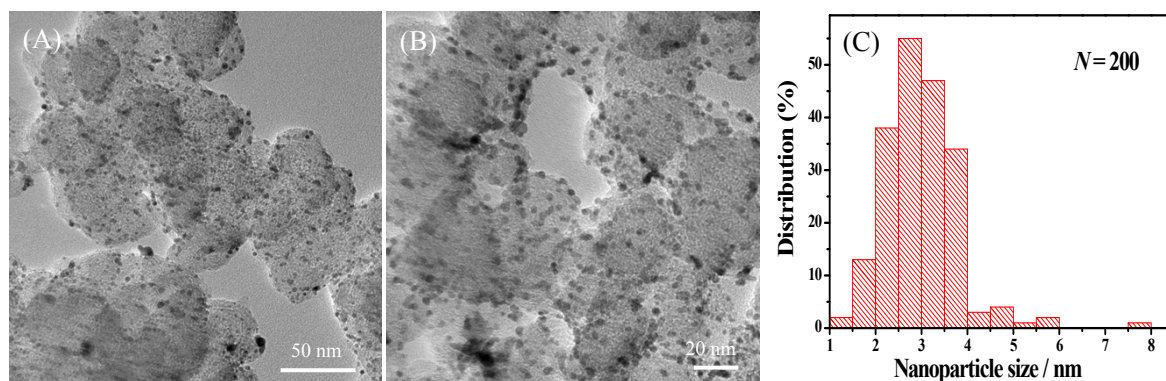

Fig. S1 TEM images (A and B) and the size distribution histogram (C) of commercial Pt/C catalyst (20% Pt loading).

Fig. S1 shows the TEM images (A and B) and the size distribution histogram (C) of commercial Pt/C catalyst (20% Pt loading). From A and B, we can see that most of Pt nanoparticles are uniformly dispersed on the carbon support with a little aggregation. The average particle size of Pt revealed by the size distribution histogram is approximately 3.0 nm.

## 2. High-resolution XPS characterization of TMPyP-graphene composite

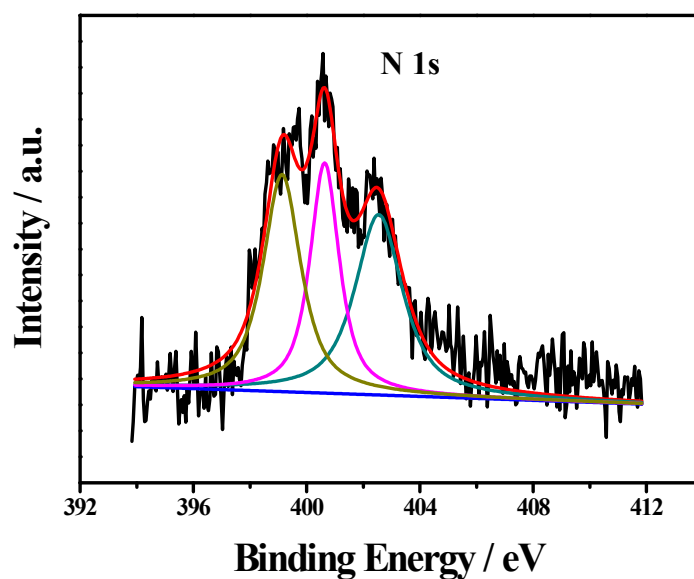

Fig. S2 N 1s spectrum of TMPyP-graphene composite.

Fig. S2 shows the N 1s spectrum of TMPyP-graphene composite. We can see that the N 1s line of TMPyP-graphene is deconvoluted into three peaks at 399.1, 400.6 and 402.5 eV, which can be assigned to the pyridinic-N, pyrrolic-N and graphitic-N, respectively.<sup>[S1,S2]</sup>

### 3. Cyclic voltammogram of methanol oxidation on 10% commercial Pt/C catalyst

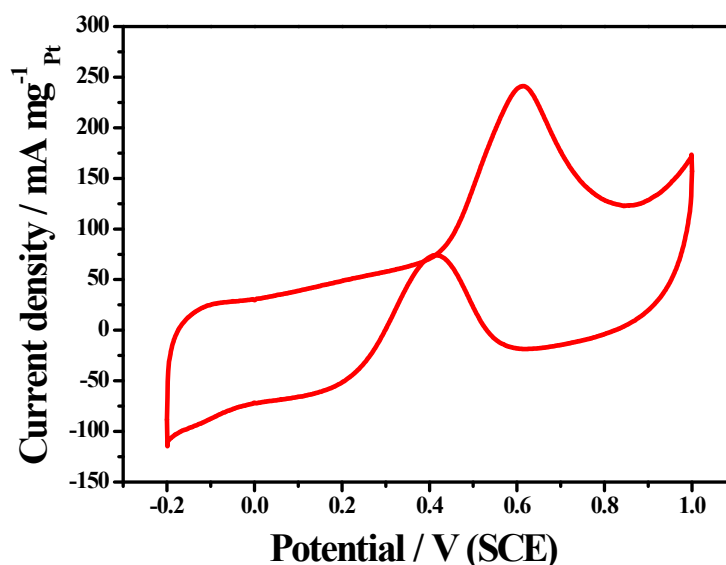

Fig. S3 Cyclic voltammogram of commercial Pt/C catalyst (10% Pt loading) in 0.5 M CH<sub>3</sub>OH + 0.5 M H<sub>2</sub>SO<sub>4</sub> solution with a scan rate of 50 mV s<sup>-1</sup>.

Fig. S3 shows the cyclic voltammogram of commercial Pt/C catalyst (Alfa Aesar, 10% Pt loading) in 0.5 M CH<sub>3</sub>OH + 0.5 M H<sub>2</sub>SO<sub>4</sub> solution. We can see that the peak current densities of methanol oxidation on the 10% commercial Pt/C catalyst in the forward potential scan and in the backward potential scan are 241.2 and 74.1 mA mg<sub>Pt</sub><sup>-1</sup>, respectively, much lower than those on the Pt/TMPyP-graphene (731.8 and 677.9 mA mg<sub>Pt</sub><sup>-1</sup>) and Pt/graphene (346.6 and 324.6 mA mg<sub>Pt</sub><sup>-1</sup>) catalysts.

### 4. The specific activity evaluation of as-prepared catalysts for methanol oxidation

Fig. S4 shows the cyclic voltammograms of methanol oxidation on Pt/TMPyP-graphene, Pt/graphene and 20% commercial Pt/C catalysts in 0.5 M CH<sub>3</sub>OH + 0.5 M H<sub>2</sub>SO<sub>4</sub> solution. The oxidation current has been normalized to the electroactive surface area of Pt catalysts which was calculated by the electronic charge of hydrogen

adsorption/desorption.<sup>[S3]</sup> It can be seen that the peak current densities of methanol oxidation on the Pt/TMPyP-graphene catalyst (**curve a**) in the forward potential scan and in the backward potential scan are 0.58 and 0.54 mA cm<sup>-2</sup>, respectively, higher than those on the Pt/graphene (**curve b**, 0.44 and 0.41 mA cm<sup>-2</sup>) and commercial Pt/C (**curve c**, 0.42 and 0.46 mA cm<sup>-2</sup>) catalysts. The results demonstrate that the presence of TMPyP in the Pt/TMPyP-graphene brings better electrocatalytic activity as compared to the Pt/graphene and commercial Pt/C catalysts.

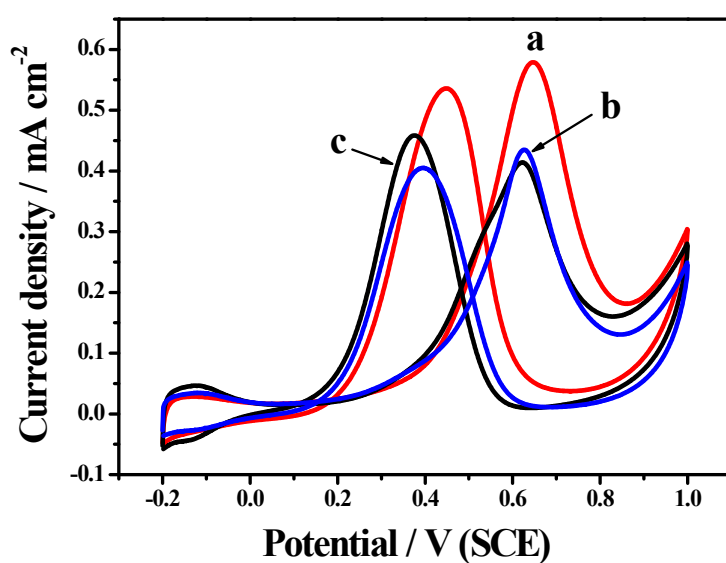

Fig. S4 Cyclic voltammograms of Pt/TMPyP-graphene (a), Pt/graphene (b) and 20% commercial Pt/C (c) catalysts in 0.5 M CH<sub>3</sub>OH + 0.5 M H<sub>2</sub>SO<sub>4</sub> solution with a scan rate of 50 mV s<sup>-1</sup>.

[S1] L. Ding, J.L. Qiao, X.F. Dai, J. Zhang, J.J. Zhang, B.L. Tian, *Int. J. Hydrogen Energy* 37 (2012) 14103–

14113.

[S2] K.C. Lee, L. Zhang, H.S. Liu, R. Hui, Z. Shi, J.J. Zhang, *Electrochim. Acta* 54 (2009) 4704–4711.

[S3] N. Tian Z.Y. Zhou, S.G. Sun, Y. Ding, Z.L. Wang, *Science* 316 (2007) 732–735.
